# Supplementary material
Source: publisher figshare collection journal article supplement (https://acs.figshare.com/ndownloader/files/3962704)
Supplement: Supplementary file 1 [file 3962704]

  
data_cd212702 
  
_audit_creation_method            SHELXL-97 
_chemical_name_systematic 
; 
 ? 
; 
_chemical_name_common             ? 
_chemical_melting_point           ? 
_chemical_formula_moiety          ? 
_chemical_formula_sum 
 'C28 H22 O2' 
_chemical_formula_weight          390.46 
  
loop_ 
 _atom_type_symbol 
 _atom_type_description 
 _atom_type_scat_dispersion_real 
 _atom_type_scat_dispersion_imag 
 _atom_type_scat_source 
 'C'  'C'   0.0033   0.0016 
 'International Tables Vol C Tables 4.2.6.8 and 6.1.1.4' 
 'H'  'H'   0.0000   0.0000 
 'International Tables Vol C Tables 4.2.6.8 and 6.1.1.4' 
 'O'  'O'   0.0106   0.0060 
 'International Tables Vol C Tables 4.2.6.8 and 6.1.1.4' 
  
_symmetry_cell_setting            Monoclinic 
_symmetry_space_group_name_H-M    P2(1)/n 
  
loop_ 
 _symmetry_equiv_pos_as_xyz 
 'x, y, z' 
 '-x+1/2, y+1/2, -z+1/2' 
 '-x, -y, -z' 
 'x-1/2, -y-1/2, z-1/2' 
  
_cell_length_a                    13.0933(14) 
_cell_length_b                    10.9512(11) 
_cell_length_c                    14.9276(15) 
_cell_angle_alpha                 90.00 
_cell_angle_beta                  107.682(2) 
_cell_angle_gamma                 90.00 
_cell_volume                      2039.3(4) 
_cell_formula_units_Z             4 
_cell_measurement_temperature     293(2) 
_cell_measurement_reflns_used     2329 
_cell_measurement_theta_min       4.694 
_cell_measurement_theta_max       45.214 
  
_exptl_crystal_description        prismatic 
_exptl_crystal_colour             colorless 
_exptl_crystal_size_max           0.265 
_exptl_crystal_size_mid           0.168 
_exptl_crystal_size_min           0.123 
_exptl_crystal_density_meas       ? 
_exptl_crystal_density_diffrn     1.272 
_exptl_crystal_density_method     'not measured' 
_exptl_crystal_F_000              824 
_exptl_absorpt_coefficient_mu     0.079 
_exptl_absorpt_correction_type    empirical 
_exptl_absorpt_correction_T_min   0.52232 
_exptl_absorpt_correction_T_max   1.00000 
_exptl_absorpt_process_details    sadabs 
  
_exptl_special_details 
; 
 ? 
; 
  
_diffrn_ambient_temperature       293(2) 
_diffrn_radiation_wavelength      0.71073 
_diffrn_radiation_type            MoK\a 
_diffrn_radiation_source          'fine-focus sealed tube' 
_diffrn_radiation_monochromator   graphite 
_diffrn_measurement_device_type   'CCD area detector' 
_diffrn_measurement_method        'phi and omega scans' 
_diffrn_detector_area_resol_mean  ? 
_diffrn_standards_number          ? 
_diffrn_standards_interval_count  ? 
_diffrn_standards_interval_time   ? 
_diffrn_standards_decay_%         ? 
_diffrn_reflns_number             11693 
_diffrn_reflns_av_R_equivalents   0.0313 
_diffrn_reflns_av_sigmaI/netI     0.0343 
_diffrn_reflns_limit_h_min        -16 
_diffrn_reflns_limit_h_max        16 
_diffrn_reflns_limit_k_min        -8 
_diffrn_reflns_limit_k_max        13 
_diffrn_reflns_limit_l_min        -18 
_diffrn_reflns_limit_l_max        18 
_diffrn_reflns_theta_min          1.82 
_diffrn_reflns_theta_max          26.00 
_reflns_number_total              4006 
_reflns_number_gt                 2914 
_reflns_threshold_expression      >2sigma(I) 
  
_computing_data_collection        'Bruker SMART' 
_computing_cell_refinement        'Bruker SMART' 
_computing_data_reduction         'Bruker SHELXTL' 
_computing_structure_solution     'SHELXS-97 (Sheldrick, 1990)' 
_computing_structure_refinement   'SHELXL-97 (Sheldrick, 1997)' 
_computing_molecular_graphics     'Bruker SHELXTL' 
_computing_publication_material   'Bruker SHELXTL' 
  
_refine_special_details 
; 
 Refinement of F^2^ against ALL reflections.  The weighted R-factor wR and 
 goodness of fit S are based on F^2^, conventional R-factors R are based 
 on F, with F set to zero for negative F^2^. The threshold expression of 
 F^2^ > 2sigma(F^2^) is used only for calculating R-factors(gt) etc. and is 
 not relevant to the choice of reflections for refinement.  R-factors based 
 on F^2^ are statistically about twice as large as those based on F, and R- 
 factors based on ALL data will be even larger. 
; 
  
_refine_ls_structure_factor_coef  Fsqd 
_refine_ls_matrix_type            full 
_refine_ls_weighting_scheme       calc 
_refine_ls_weighting_details 
 'calc w=1/[\s^2^(Fo^2^)+(0.0655P)^2^+0.4588P] where P=(Fo^2^+2Fc^2^)/3' 
_atom_sites_solution_primary      direct 
_atom_sites_solution_secondary    difmap 
_atom_sites_solution_hydrogens    geom 
_refine_ls_hydrogen_treatment     constr 
_refine_ls_extinction_method      none 
_refine_ls_extinction_coef        ? 
_refine_ls_number_reflns          4006 
_refine_ls_number_parameters      272 
_refine_ls_number_restraints      0 
_refine_ls_R_factor_all           0.0749 
_refine_ls_R_factor_gt            0.0534 
_refine_ls_wR_factor_ref          0.1461 
_refine_ls_wR_factor_gt           0.1339 
_refine_ls_goodness_of_fit_ref    1.043 
_refine_ls_restrained_S_all       1.043 
_refine_ls_shift/su_max           0.000 
_refine_ls_shift/su_mean          0.000 
  
loop_ 
 _atom_site_label 
 _atom_site_type_symbol 
 _atom_site_fract_x 
 _atom_site_fract_y 
 _atom_site_fract_z 
 _atom_site_U_iso_or_equiv 
 _atom_site_adp_type 
 _atom_site_occupancy 
 _atom_site_symmetry_multiplicity 
 _atom_site_calc_flag 
 _atom_site_refinement_flags 
 _atom_site_disorder_assembly 
 _atom_site_disorder_group 
O1 O 0.44518(11) 0.84659(14) 1.03268(10) 0.0609(4) Uani 1 1 d . . . 
O2 O 0.44533(14) 0.75992(15) 0.62487(11) 0.0716(5) Uani 1 1 d . . . 
C1 C 0.51797(18) 0.7629(3) 1.09576(16) 0.0707(7) Uani 1 1 d . . . 
H1A H 0.5380 0.7929 1.1599 0.085 Uiso 1 1 calc R . . 
H1B H 0.5824 0.7516 1.0775 0.085 Uiso 1 1 calc R . . 
C2 C 0.45709(18) 0.6469(2) 1.08690(14) 0.0567(6) Uani 1 1 d . . . 
C3 C 0.4861(2) 0.5275(3) 1.11070(16) 0.0780(8) Uani 1 1 d . . . 
H3 H 0.5565 0.5073 1.1437 0.094 Uiso 1 1 calc R . . 
C4 C 0.4079(3) 0.4386(3) 1.08420(19) 0.0822(9) Uani 1 1 d . . . 
H4 H 0.4263 0.3580 1.1014 0.099 Uiso 1 1 calc R . . 
C5 C 0.3021(2) 0.4654(2) 1.03253(17) 0.0676(7) Uani 1 1 d . . . 
H5 H 0.2519 0.4030 1.0137 0.081 Uiso 1 1 calc R . . 
C6 C 0.27214(17) 0.58684(17) 1.00925(13) 0.0482(5) Uani 1 1 d . . . 
C7 C 0.35119(16) 0.67292(18) 1.04023(12) 0.0448(5) Uani 1 1 d . . . 
C8 C 0.33754(15) 0.80683(18) 1.02190(13) 0.0450(5) Uani 1 1 d . . . 
C9 C 0.26147(15) 0.82554(17) 0.92125(12) 0.0447(5) Uani 1 1 d . . . 
H9 H 0.2395 0.9115 0.9156 0.054 Uiso 1 1 calc R . . 
C10 C 0.16130(15) 0.74937(18) 0.91076(12) 0.0447(5) Uani 1 1 d . . . 
C11 C 0.16677(16) 0.63175(18) 0.95044(13) 0.0466(5) Uani 1 1 d . . . 
C12 C 0.0736(2) 0.5629(2) 0.93242(17) 0.0643(6) Uani 1 1 d . . . 
H12 H 0.0765 0.4853 0.9584 0.077 Uiso 1 1 calc R . . 
C13 C -0.0230(2) 0.6080(3) 0.87662(19) 0.0761(8) Uani 1 1 d . . . 
H13 H -0.0847 0.5609 0.8653 0.091 Uiso 1 1 calc R . . 
C14 C -0.02817(19) 0.7212(3) 0.83806(17) 0.0733(8) Uani 1 1 d . . . 
H14 H -0.0935 0.7510 0.8000 0.088 Uiso 1 1 calc R . . 
C15 C 0.06253(17) 0.7920(2) 0.85504(14) 0.0587(6) Uani 1 1 d . . . 
H15 H 0.0576 0.8697 0.8288 0.070 Uiso 1 1 calc R . . 
C16 C 0.29348(16) 0.87630(18) 1.09214(13) 0.0477(5) Uani 1 1 d . . . 
C17 C 0.3201(2) 0.9976(2) 1.11042(16) 0.0651(6) Uani 1 1 d . . . 
H17 H 0.3646 1.0358 1.0808 0.078 Uiso 1 1 calc R . . 
C18 C 0.2811(2) 1.0635(2) 1.17275(18) 0.0745(7) Uani 1 1 d . . . 
H18 H 0.2999 1.1451 1.1844 0.089 Uiso 1 1 calc R . . 
C19 C 0.2157(2) 1.0097(2) 1.21692(16) 0.0674(7) Uani 1 1 d . . . 
H19 H 0.1907 1.0541 1.2591 0.081 Uiso 1 1 calc R . . 
C20 C 0.18721(19) 0.8902(2) 1.19879(15) 0.0603(6) Uani 1 1 d . . . 
H20 H 0.1419 0.8533 1.2281 0.072 Uiso 1 1 calc R . . 
C21 C 0.22578(17) 0.8236(2) 1.13665(14) 0.0533(5) Uani 1 1 d . . . 
H21 H 0.2058 0.7423 1.1248 0.064 Uiso 1 1 calc R . . 
C22 C 0.31199(16) 0.79982(17) 0.84394(13) 0.0455(5) Uani 1 1 d . . . 
C23 C 0.28747(16) 0.69906(18) 0.78670(13) 0.0471(5) Uani 1 1 d . . . 
H23 H 0.2411 0.6407 0.7978 0.057 Uiso 1 1 calc R . . 
C24 C 0.32969(16) 0.68140(18) 0.71272(14) 0.0502(5) Uani 1 1 d . . . 
H24 H 0.3111 0.6125 0.6748 0.060 Uiso 1 1 calc R . . 
C25 C 0.39919(17) 0.7664(2) 0.69585(14) 0.0526(5) Uani 1 1 d . . . 
C26 C 0.4259(2) 0.8679(2) 0.75363(16) 0.0657(6) Uani 1 1 d . . . 
H26 H 0.4731 0.9257 0.7433 0.079 Uiso 1 1 calc R . . 
C27 C 0.3829(2) 0.8836(2) 0.82593(15) 0.0622(6) Uani 1 1 d . . . 
H27 H 0.4018 0.9523 0.8640 0.075 Uiso 1 1 calc R . . 
C28 C 0.4170(3) 0.6610(3) 0.56122(18) 0.0862(8) Uani 1 1 d . . . 
H28A H 0.4377 0.5857 0.5947 0.129 Uiso 1 1 calc R . . 
H28B H 0.4532 0.6690 0.5144 0.129 Uiso 1 1 calc R . . 
H28C H 0.3409 0.6613 0.5313 0.129 Uiso 1 1 calc R . . 
  
loop_ 
 _atom_site_aniso_label 
 _atom_site_aniso_U_11 
 _atom_site_aniso_U_22 
 _atom_site_aniso_U_33 
 _atom_site_aniso_U_23 
 _atom_site_aniso_U_13 
 _atom_site_aniso_U_12 
O1 0.0489(8) 0.0780(11) 0.0515(8) 0.0028(7) 0.0089(7) -0.0127(7) 
O2 0.0919(12) 0.0735(11) 0.0627(10) 0.0046(8) 0.0435(9) -0.0037(9) 
C1 0.0469(13) 0.109(2) 0.0502(13) -0.0011(13) 0.0057(10) 0.0068(13) 
C2 0.0565(13) 0.0756(16) 0.0375(10) 0.0043(10) 0.0132(9) 0.0203(12) 
C3 0.0853(18) 0.099(2) 0.0505(14) 0.0179(14) 0.0213(13) 0.0476(17) 
C4 0.130(3) 0.0625(16) 0.0686(16) 0.0259(14) 0.0518(17) 0.0460(18) 
C5 0.104(2) 0.0474(13) 0.0631(14) 0.0092(11) 0.0428(14) 0.0134(13) 
C6 0.0667(13) 0.0416(11) 0.0427(10) 0.0033(9) 0.0262(10) 0.0033(10) 
C7 0.0521(11) 0.0497(11) 0.0327(9) 0.0049(8) 0.0129(8) 0.0098(9) 
C8 0.0421(10) 0.0494(11) 0.0395(10) 0.0004(9) 0.0061(8) -0.0063(9) 
C9 0.0536(12) 0.0388(10) 0.0377(10) 0.0028(8) 0.0078(8) -0.0008(9) 
C10 0.0467(11) 0.0494(11) 0.0364(9) -0.0067(8) 0.0101(8) 0.0018(9) 
C11 0.0516(12) 0.0495(11) 0.0435(10) -0.0085(9) 0.0215(9) -0.0063(9) 
C12 0.0737(16) 0.0653(15) 0.0649(14) -0.0175(12) 0.0377(13) -0.0207(12) 
C13 0.0535(15) 0.106(2) 0.0724(17) -0.0356(16) 0.0248(13) -0.0261(15) 
C14 0.0461(13) 0.113(2) 0.0553(14) -0.0300(15) 0.0077(11) 0.0016(14) 
C15 0.0512(13) 0.0746(15) 0.0441(11) -0.0118(10) 0.0052(9) 0.0106(11) 
C16 0.0514(11) 0.0485(12) 0.0352(10) -0.0012(8) 0.0013(9) 0.0016(9) 
C17 0.0821(16) 0.0537(14) 0.0572(13) -0.0066(11) 0.0177(12) -0.0126(12) 
C18 0.102(2) 0.0493(13) 0.0656(15) -0.0186(12) 0.0159(15) -0.0013(13) 
C19 0.0785(16) 0.0663(16) 0.0541(13) -0.0098(12) 0.0151(12) 0.0161(13) 
C20 0.0648(14) 0.0667(15) 0.0501(12) -0.0015(11) 0.0184(11) 0.0097(12) 
C21 0.0614(13) 0.0502(12) 0.0471(11) -0.0021(9) 0.0146(10) 0.0014(10) 
C22 0.0535(11) 0.0437(11) 0.0366(9) 0.0048(8) 0.0098(8) -0.0023(9) 
C23 0.0497(11) 0.0440(11) 0.0482(11) 0.0026(9) 0.0154(9) -0.0054(9) 
C24 0.0568(12) 0.0466(11) 0.0473(11) -0.0015(9) 0.0158(10) -0.0002(9) 
C25 0.0587(13) 0.0578(13) 0.0429(11) 0.0098(10) 0.0176(10) 0.0023(10) 
C26 0.0826(16) 0.0620(14) 0.0566(13) 0.0041(11) 0.0273(12) -0.0248(12) 
C27 0.0877(17) 0.0540(13) 0.0469(12) -0.0026(10) 0.0236(11) -0.0228(12) 
C28 0.120(2) 0.090(2) 0.0643(16) -0.0078(14) 0.0511(16) -0.0019(17) 
  
_geom_special_details 
; 
 All esds (except the esd in the dihedral angle between two l.s. planes) 
 are estimated using the full covariance matrix.  The cell esds are taken 
 into account individually in the estimation of esds in distances, angles 
 and torsion angles; correlations between esds in cell parameters are only 
 used when they are defined by crystal symmetry.  An approximate (isotropic) 
 treatment of cell esds is used for estimating esds involving l.s. planes. 
; 
  
loop_ 
 _geom_bond_atom_site_label_1 
 _geom_bond_atom_site_label_2 
 _geom_bond_distance 
 _geom_bond_site_symmetry_2 
 _geom_bond_publ_flag 
O1 C8 1.437(2) . ? 
O1 C1 1.446(3) . ? 
O2 C25 1.372(2) . ? 
O2 C28 1.414(3) . ? 
C1 C2 1.484(3) . ? 
C1 H1A 0.9700 . ? 
C1 H1B 0.9700 . ? 
C2 C3 1.378(3) . ? 
C2 C7 1.379(3) . ? 
C3 C4 1.381(4) . ? 
C3 H3 0.9300 . ? 
C4 C5 1.396(4) . ? 
C4 H4 0.9300 . ? 
C5 C6 1.400(3) . ? 
C5 H5 0.9300 . ? 
C6 C7 1.372(3) . ? 
C6 C11 1.477(3) . ? 
C7 C8 1.493(3) . ? 
C8 C16 1.542(3) . ? 
C8 C9 1.543(3) . ? 
C9 C22 1.521(3) . ? 
C9 C10 1.522(3) . ? 
C9 H9 0.9800 . ? 
C10 C15 1.389(3) . ? 
C10 C11 1.410(3) . ? 
C11 C12 1.389(3) . ? 
C12 C13 1.377(4) . ? 
C12 H12 0.9300 . ? 
C13 C14 1.360(4) . ? 
C13 H13 0.9300 . ? 
C14 C15 1.376(3) . ? 
C14 H14 0.9300 . ? 
C15 H15 0.9300 . ? 
C16 C17 1.380(3) . ? 
C16 C21 1.385(3) . ? 
C17 C18 1.391(3) . ? 
C17 H17 0.9300 . ? 
C18 C19 1.363(4) . ? 
C18 H18 0.9300 . ? 
C19 C20 1.365(3) . ? 
C19 H19 0.9300 . ? 
C20 C21 1.390(3) . ? 
C20 H20 0.9300 . ? 
C21 H21 0.9300 . ? 
C22 C23 1.373(3) . ? 
C22 C27 1.389(3) . ? 
C23 C24 1.391(3) . ? 
C23 H23 0.9300 . ? 
C24 C25 1.377(3) . ? 
C24 H24 0.9300 . ? 
C25 C26 1.386(3) . ? 
C26 C27 1.371(3) . ? 
C26 H26 0.9300 . ? 
C27 H27 0.9300 . ? 
C28 H28A 0.9600 . ? 
C28 H28B 0.9600 . ? 
C28 H28C 0.9600 . ? 
  
loop_ 
 _geom_angle_atom_site_label_1 
 _geom_angle_atom_site_label_2 
 _geom_angle_atom_site_label_3 
 _geom_angle 
 _geom_angle_site_symmetry_1 
 _geom_angle_site_symmetry_3 
 _geom_angle_publ_flag 
C8 O1 C1 108.12(16) . . ? 
C25 O2 C28 118.13(19) . . ? 
O1 C1 C2 104.75(17) . . ? 
O1 C1 H1A 110.8 . . ? 
C2 C1 H1A 110.8 . . ? 
O1 C1 H1B 110.8 . . ? 
C2 C1 H1B 110.8 . . ? 
H1A C1 H1B 108.9 . . ? 
C3 C2 C7 118.8(2) . . ? 
C3 C2 C1 133.7(2) . . ? 
C7 C2 C1 107.38(19) . . ? 
C2 C3 C4 118.2(2) . . ? 
C2 C3 H3 120.9 . . ? 
C4 C3 H3 120.9 . . ? 
C3 C4 C5 122.3(2) . . ? 
C3 C4 H4 118.8 . . ? 
C5 C4 H4 118.8 . . ? 
C4 C5 C6 119.5(3) . . ? 
C4 C5 H5 120.2 . . ? 
C6 C5 H5 120.2 . . ? 
C7 C6 C5 116.3(2) . . ? 
C7 C6 C11 116.39(17) . . ? 
C5 C6 C11 127.2(2) . . ? 
C6 C7 C2 124.61(19) . . ? 
C6 C7 C8 125.25(17) . . ? 
C2 C7 C8 109.97(19) . . ? 
O1 C8 C7 102.62(16) . . ? 
O1 C8 C16 109.34(15) . . ? 
C7 C8 C16 114.13(16) . . ? 
O1 C8 C9 112.95(15) . . ? 
C7 C8 C9 108.35(15) . . ? 
C16 C8 C9 109.41(15) . . ? 
C22 C9 C10 112.35(15) . . ? 
C22 C9 C8 114.41(16) . . ? 
C10 C9 C8 107.97(15) . . ? 
C22 C9 H9 107.3 . . ? 
C10 C9 H9 107.3 . . ? 
C8 C9 H9 107.3 . . ? 
C15 C10 C11 118.5(2) . . ? 
C15 C10 C9 119.60(19) . . ? 
C11 C10 C9 121.68(17) . . ? 
C12 C11 C10 119.0(2) . . ? 
C12 C11 C6 122.8(2) . . ? 
C10 C11 C6 118.22(18) . . ? 
C13 C12 C11 120.9(2) . . ? 
C13 C12 H12 119.6 . . ? 
C11 C12 H12 119.6 . . ? 
C14 C13 C12 120.1(2) . . ? 
C14 C13 H13 119.9 . . ? 
C12 C13 H13 119.9 . . ? 
C13 C14 C15 120.4(2) . . ? 
C13 C14 H14 119.8 . . ? 
C15 C14 H14 119.8 . . ? 
C14 C15 C10 121.0(2) . . ? 
C14 C15 H15 119.5 . . ? 
C10 C15 H15 119.5 . . ? 
C17 C16 C21 117.8(2) . . ? 
C17 C16 C8 119.02(19) . . ? 
C21 C16 C8 123.15(18) . . ? 
C16 C17 C18 120.6(2) . . ? 
C16 C17 H17 119.7 . . ? 
C18 C17 H17 119.7 . . ? 
C19 C18 C17 120.8(2) . . ? 
C19 C18 H18 119.6 . . ? 
C17 C18 H18 119.6 . . ? 
C18 C19 C20 119.5(2) . . ? 
C18 C19 H19 120.3 . . ? 
C20 C19 H19 120.3 . . ? 
C19 C20 C21 120.2(2) . . ? 
C19 C20 H20 119.9 . . ? 
C21 C20 H20 119.9 . . ? 
C16 C21 C20 121.1(2) . . ? 
C16 C21 H21 119.4 . . ? 
C20 C21 H21 119.4 . . ? 
C23 C22 C27 117.02(19) . . ? 
C23 C22 C9 123.22(17) . . ? 
C27 C22 C9 119.69(18) . . ? 
C22 C23 C24 122.14(19) . . ? 
C22 C23 H23 118.9 . . ? 
C24 C23 H23 118.9 . . ? 
C25 C24 C23 119.69(19) . . ? 
C25 C24 H24 120.2 . . ? 
C23 C24 H24 120.2 . . ? 
O2 C25 C24 125.2(2) . . ? 
O2 C25 C26 115.80(19) . . ? 
C24 C25 C26 119.0(2) . . ? 
C27 C26 C25 120.3(2) . . ? 
C27 C26 H26 119.9 . . ? 
C25 C26 H26 119.9 . . ? 
C26 C27 C22 121.9(2) . . ? 
C26 C27 H27 119.1 . . ? 
C22 C27 H27 119.1 . . ? 
O2 C28 H28A 109.5 . . ? 
O2 C28 H28B 109.5 . . ? 
H28A C28 H28B 109.5 . . ? 
O2 C28 H28C 109.5 . . ? 
H28A C28 H28C 109.5 . . ? 
H28B C28 H28C 109.5 . . ? 
  
loop_ 
 _geom_torsion_atom_site_label_1 
 _geom_torsion_atom_site_label_2 
 _geom_torsion_atom_site_label_3 
 _geom_torsion_atom_site_label_4 
 _geom_torsion 
 _geom_torsion_site_symmetry_1 
 _geom_torsion_site_symmetry_2 
 _geom_torsion_site_symmetry_3 
 _geom_torsion_site_symmetry_4 
 _geom_torsion_publ_flag 
C8 O1 C1 C2 25.3(2) . . . . ? 
O1 C1 C2 C3 163.2(2) . . . . ? 
O1 C1 C2 C7 -13.1(2) . . . . ? 
C7 C2 C3 C4 1.8(3) . . . . ? 
C1 C2 C3 C4 -174.2(2) . . . . ? 
C2 C3 C4 C5 1.7(4) . . . . ? 
C3 C4 C5 C6 -2.5(4) . . . . ? 
C4 C5 C6 C7 -0.3(3) . . . . ? 
C4 C5 C6 C11 175.8(2) . . . . ? 
C5 C6 C7 C2 3.9(3) . . . . ? 
C11 C6 C7 C2 -172.58(18) . . . . ? 
C5 C6 C7 C8 178.75(18) . . . . ? 
C11 C6 C7 C8 2.2(3) . . . . ? 
C3 C2 C7 C6 -4.8(3) . . . . ? 
C1 C2 C7 C6 172.18(18) . . . . ? 
C3 C2 C7 C8 179.71(18) . . . . ? 
C1 C2 C7 C8 -3.3(2) . . . . ? 
C1 O1 C8 C7 -26.7(2) . . . . ? 
C1 O1 C8 C16 94.84(19) . . . . ? 
C1 O1 C8 C9 -143.08(17) . . . . ? 
C6 C7 C8 O1 -157.03(18) . . . . ? 
C2 C7 C8 O1 18.4(2) . . . . ? 
C6 C7 C8 C16 84.8(2) . . . . ? 
C2 C7 C8 C16 -99.74(19) . . . . ? 
C6 C7 C8 C9 -37.3(3) . . . . ? 
C2 C7 C8 C9 138.11(17) . . . . ? 
O1 C8 C9 C22 38.3(2) . . . . ? 
C7 C8 C9 C22 -74.7(2) . . . . ? 
C16 C8 C9 C22 160.34(16) . . . . ? 
O1 C8 C9 C10 164.20(16) . . . . ? 
C7 C8 C9 C10 51.2(2) . . . . ? 
C16 C8 C9 C10 -73.77(19) . . . . ? 
C22 C9 C10 C15 -87.2(2) . . . . ? 
C8 C9 C10 C15 145.71(18) . . . . ? 
C22 C9 C10 C11 87.9(2) . . . . ? 
C8 C9 C10 C11 -39.2(2) . . . . ? 
C15 C10 C11 C12 0.1(3) . . . . ? 
C9 C10 C11 C12 -175.09(18) . . . . ? 
C15 C10 C11 C6 179.74(17) . . . . ? 
C9 C10 C11 C6 4.6(3) . . . . ? 
C7 C6 C11 C12 -164.47(18) . . . . ? 
C5 C6 C11 C12 19.4(3) . . . . ? 
C7 C6 C11 C10 15.9(3) . . . . ? 
C5 C6 C11 C10 -160.20(19) . . . . ? 
C10 C11 C12 C13 0.1(3) . . . . ? 
C6 C11 C12 C13 -179.55(19) . . . . ? 
C11 C12 C13 C14 0.1(3) . . . . ? 
C12 C13 C14 C15 -0.6(4) . . . . ? 
C13 C14 C15 C10 0.7(3) . . . . ? 
C11 C10 C15 C14 -0.5(3) . . . . ? 
C9 C10 C15 C14 174.78(18) . . . . ? 
O1 C8 C16 C17 37.4(2) . . . . ? 
C7 C8 C16 C17 151.69(19) . . . . ? 
C9 C8 C16 C17 -86.7(2) . . . . ? 
O1 C8 C16 C21 -144.18(18) . . . . ? 
C7 C8 C16 C21 -29.9(3) . . . . ? 
C9 C8 C16 C21 91.6(2) . . . . ? 
C21 C16 C17 C18 1.0(3) . . . . ? 
C8 C16 C17 C18 179.4(2) . . . . ? 
C16 C17 C18 C19 -0.1(4) . . . . ? 
C17 C18 C19 C20 -0.8(4) . . . . ? 
C18 C19 C20 C21 0.8(3) . . . . ? 
C17 C16 C21 C20 -1.0(3) . . . . ? 
C8 C16 C21 C20 -179.36(18) . . . . ? 
C19 C20 C21 C16 0.1(3) . . . . ? 
C10 C9 C22 C23 -15.8(3) . . . . ? 
C8 C9 C22 C23 107.8(2) . . . . ? 
C10 C9 C22 C27 161.09(18) . . . . ? 
C8 C9 C22 C27 -75.3(2) . . . . ? 
C27 C22 C23 C24 -1.1(3) . . . . ? 
C9 C22 C23 C24 175.90(18) . . . . ? 
C22 C23 C24 C25 0.6(3) . . . . ? 
C28 O2 C25 C24 2.5(3) . . . . ? 
C28 O2 C25 C26 -177.2(2) . . . . ? 
C23 C24 C25 O2 -179.40(18) . . . . ? 
C23 C24 C25 C26 0.2(3) . . . . ? 
O2 C25 C26 C27 179.2(2) . . . . ? 
C24 C25 C26 C27 -0.5(3) . . . . ? 
C25 C26 C27 C22 -0.1(4) . . . . ? 
C23 C22 C27 C26 0.8(3) . . . . ? 
C9 C22 C27 C26 -176.3(2) . . . . ? 
  
_diffrn_measured_fraction_theta_max    0.999 
_diffrn_reflns_theta_full              26.00 
_diffrn_measured_fraction_theta_full   0.999 
_refine_diff_density_max    0.300 
_refine_diff_density_min   -0.149 
_refine_diff_density_rms    0.035 
